# Supplementary material
Source: PubMed Central journal article supplement (PMC2746025)
Supplement: NIHMS122263-supplement-Legend.pdf [file NIHMS122263-supplement-Legend.pdf]

**Supplementary Figure 1:** Skbr-3 cells stably expressing vector control were grown in 2D-cultures. Cells were plated in slide chambers, fixed and immunostained for PTEN-ser380 (red) and E-cadherin (green). Nuclei were stained with DAPI (blue).
