# Supplementary material
Source: PubMed Central journal article supplement (PMC2746025)

**Supplemental Figure 1:**

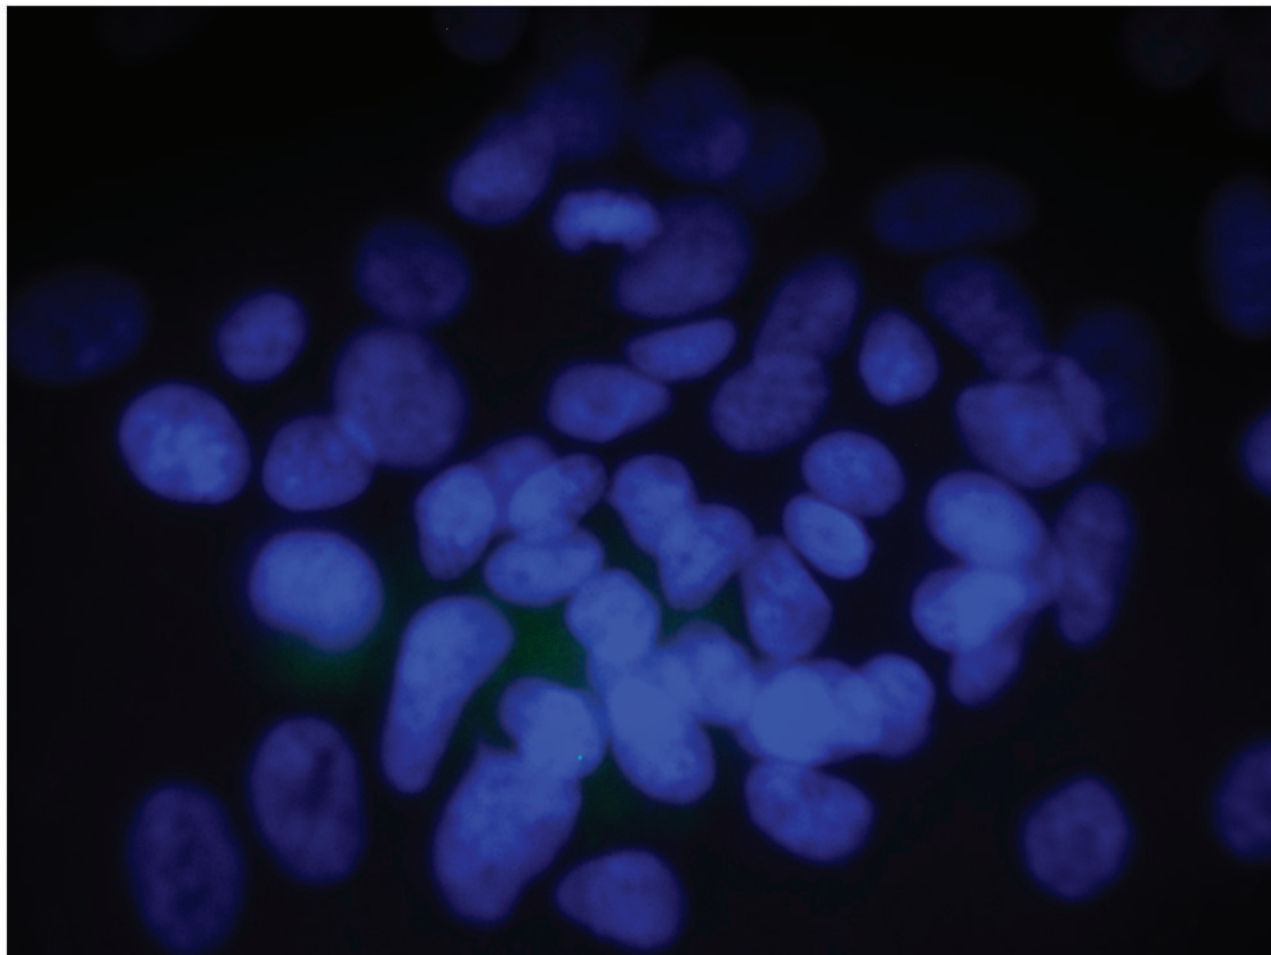

Supplement: NIHMS122263-supplement-Figure.pdf [file NIHMS122263-supplement-Figure.pdf]
